# Supplementary material for: Contrast Volume-to-Estimated Glomerular Filtration Rate Ratio as a Predictor of Short-Term Outcomes Following Transcatheter Aortic Valve Implantation
Source: MDPI journal article supplement (doi:10.3390/jcm13102971), 2024-05-17
Supplement: s1 [file s1]

## Supplementary Material

**Table S1.** Baseline and procedural characteristics of study participants by AKI.

|                                  | No AKI<br>(n = 978) | AKI<br>(n = 76)  | * <i>p</i> -value |
|----------------------------------|---------------------|------------------|-------------------|
| Age, years                       | 84 (79–88)          | 84 (78–87)       | 0.460             |
| Female                           | 486 (50)            | 33 (43)          | 0.292             |
| Urgent                           | 214 (22)            | 15 (20)          | 0.662             |
| Diabetes                         | 233 (24)            | 29 (38)          | <b>0.005</b>      |
| Hypertension                     | 760 (78)            | 58 (76)          | 0.779             |
| Previous MI                      | 156 (16)            | 17 (22)          | 0.146             |
| Prior revascularisation          | 155 (16)            | 13 (17)          | 0.773             |
| SAVR history                     | 24 (2.5)            | 1 (1.3)          | >0.999            |
| Previous stroke/TIA              | 161 (16)            | 15 (20)          | 0.461             |
| PVD                              | 69 (7.1)            | 8 (11)           | 0.263             |
| Chronic pulmonary disease        | 233 (24)            | 22 (29)          | 0.315             |
| Indication (AS or AR), AS        | 962 (98)            | 73 (96)          | 0.152             |
| NYHA ≥ 3                         | 601 (62)            | 49 (65)          | 0.519             |
| Significant LMS disease          | 71 (7.6)            | 7 (9.9)          | 0.497             |
| Significant non-LMS CAD          | 384 (41)            | 43 (61)          | <b>0.001</b>      |
| ≥Moderate MR                     | 652 (69)            | 46 (66)          | 0.568             |
| LVEF, %                          |                     |                  | 0.319             |
| ≥50                              | 195 (20)            | 20 (27)          |                   |
| 30–50                            | 195 (20)            | 16 (21)          |                   |
| <30                              | 583 (60)            | 39 (52)          |                   |
| AV mean gradient, mmHg           | 42 (35–51)          | 40 (32–46)       | <b>0.016</b>      |
| AV peak gradient, mmHg           | 72 (61–85)          | 67 (54–77)       | <b>0.021</b>      |
| AV area, cm <sup>2</sup>         | 0.70 (0.60–0.80)    | 0.70 (0.60–0.90) | 0.172             |
| PA systolic pressure, mmHg       | 36 (30–47)          | 36 (30–45)       | 0.879             |
| Contrast volume used, ml         | 117 (98–150)        | 120 (100–156)    | 0.456             |
| eGFR, ml/min/1.73 m <sup>2</sup> |                     |                  | 0.131             |
| ≥60                              | 467 (48)            | 29 (38)          |                   |
| 30–59                            | 461 (47)            | 45 (59)          |                   |
| <30                              | 50 (5.1)            | 2 (2.6)          |                   |
| Euroscore II                     | 3.00 (1.84–4.72)    | 4.17 (2.24–6.19) | <b>0.025</b>      |
| GA                               | 56 (5.7)            | 8 (11)           | 0.127             |
| Procedural BAV                   | 147 (15)            | 11 (14)          | 0.890             |
| Contrast volume used, ml         | 117 (98–150)        | 120 (100–156)    | 0.456             |
| TAVI delivery, femoral           | 952 (98)            | 73 (96)          | 0.249             |
| Balloon-expanding valve          | 862 (88)            | 64 (84)          | 0.276             |
| Successful valve deployment      | 926 (95)            | 74 (97)          | 0.576             |
| CV/eGFR                          | 2.14 (1.56–2.94)    | 2.32 (1.62–3.54) | 0.060             |

Abbreviations: CV/eGFR—contrast volume administered normalised to estimated glomerular filtration rate, MI—myocardial infarction, SAVR—surgical aortic valve replacement, TIA—transient ischaemic attack, PVD—peripheral vascular disease, AS—aortic stenosis, AR—aortic regurgitation, NYHA—New York Heart Association, LMS—left main stem, CAD—coronary artery disease, MR—mitral regurgitation, LVEF—left ventricular ejection fraction, AV—aortic valve, PA—pulmonary artery, eGFR—estimated glomerular filtration rate, GA—general anaesthesia, BAV—bicuspid aortic valve, TAVI—transcatheter aortic valve implantation. Data are presented as medians (interquartile range) or number (percentage). \* *p*-value based on chi-squared or Mann-Whitney U test.
